# Supplementary material for: Diverse cytomotive actins and tubulins share a polymerization switch mechanism conferring robust dynamics
Source: PubMed Central journal article supplement (PMC10058229; doi:10.1126/sciadv.adf3021), 2023-03-29
Supplement: sciadv.adf3021_sm.pdf [file sciadv.adf3021_sm.pdf]

Supplementary Materials for  
**Diverse cytomotive actins and tubulins share a polymerization switch  
mechanism conferring robust dynamics**

James Mark Wagstaff *et al.*

Corresponding author: Jan Löwe, [jyl@mrc-lmb.cam.ac.uk](mailto:jyl@mrc-lmb.cam.ac.uk)

*Sci. Adv.* **9**, eadf3021 (2023)  
DOI: 10.1126/sciadv.adf3021

**The PDF file includes:**

Texts S1 and S2  
Table S1  
Figs. S1 to S12  
Legends for movies S1 and S2  
Legends for files S1 to S3

**Other Supplementary Material for this manuscript includes the following:**

Movies S1 and S2  
Files S1 to S3

# Supplementary Table

## Supplementary Table S1. Cryo-EM data collection and model statistics.

| Sample                                             | Tubulin heterodimer<br>GDP | Tubulin heterodimer<br>GTP | Microtubule<br>GDP<br>13 protofilaments | BtubAB protofilament<br>GMPCPP<br>M-loop mutant:<br>A(R284G,K286D,<br>F287G) | FtsZ protofilament<br>GMPCPP |
|----------------------------------------------------|----------------------------|----------------------------|-----------------------------------------|------------------------------------------------------------------------------|------------------------------|
| Organism                                           | <i>D. melanogaster</i>     | <i>D. melanogaster</i>     | <i>D. melanogaster</i>                  | <i>P. dejongeii</i>                                                          | <i>M. tuberculosis</i>       |
| EM Data Bank map ID                                | EMD-14147                  | EMD-14148                  | EMD-14150                               | EMD-14151                                                                    | Not deposited                |
| PDB model ID                                       | PDB 7QUC                   | PDB 7QUD                   | PDB 7QUP                                | PDB 7QUQ                                                                     | Not deposited                |
| <b>Data collection and processing</b>              |                            |                            |                                         |                                                                              |                              |
| Magnification                                      | 64,000                     | 64,000                     | 81,000                                  | 81,000                                                                       | 105,000/81,000               |
| Voltage (kV)                                       | 300                        | 300                        | 300                                     | 300                                                                          | 300                          |
| Electron fluence (e <sup>-</sup> /Å <sup>2</sup> ) | 40                         | 40                         | 35                                      | 44                                                                           | 40                           |
| Defocus range (µm)                                 | -1 to -3 (nominal)         | -1 to -3 (nominal)         | -1 to -3 (nominal)                      | -1 to -3 (nominal)                                                           | -1 to -3 (nominal)           |
| Pixel size (Å)                                     | 1.244                      | 1.244                      | 1.080                                   | 1.080 (some 40° tilted)                                                      | 0.86/1.47(40° tilted)        |
| Symmetry imposed                                   | C1                         | C1                         | local 13 pf MT                          | C1                                                                           | C1                           |
| Initial particle images (no.)                      | 6,500,000                  | 1,695,000                  | 354,399                                 | 1,600,000                                                                    | 5,000,000                    |
| Final particle images (no.)                        | 68,851                     | 34,175                     | 39,594                                  | 290,000                                                                      | 1,900,000                    |
| Map resolution (Å)                                 | 3.2                        | 3.5                        | Not gold standard                       | 2.6 (anisotropic)                                                            | ~7 (anisotropic)             |
| FSC threshold                                      | 0.143                      | 0.143                      | Not gold standard                       | 0.143                                                                        | 0.143                        |
| <b>Model</b>                                       |                            |                            |                                         |                                                                              |                              |
| Initial model used<br>(PDB code)                   | SWISSMODEL                 | SWISSMODEL                 | 3J1T                                    | 2BTQ                                                                         | 6YM1 / 3VOA                  |
| Model resolution (Å)                               | 3.4                        | 3.6                        | 3.8                                     | 3.5                                                                          | Rigid body only              |
| FSC threshold                                      | 0.5                        | 0.5                        | 0.5                                     | 0.5                                                                          |                              |
| Map sharpening B factor (Å <sup>2</sup> )          | -81                        | -61                        | -175                                    | -33                                                                          |                              |
| Model composition                                  |                            |                            |                                         |                                                                              |                              |
| Non-hydrogen atoms                                 | 6,680                      | 6,696                      | 263,094                                 | 19,095                                                                       |                              |
| Protein residues                                   | 842                        | 844                        | 33,189                                  | 2,463                                                                        |                              |
| Nucleic acid residues                              | 0                          | 0                          | 0                                       | 0                                                                            |                              |
| Ligands                                            | GTP: 1<br>GDP: 1<br>Mg: 1  | GTP: 2<br>Mg: 1            | GTP: 39<br>GDP: 39<br>Mg: 39            | G2P (GMPCPP): 6                                                              |                              |
| R.M.S. deviations                                  |                            |                            |                                         |                                                                              |                              |
| Bond lengths (Å)                                   | 0.004                      | 0.004                      | 0.005                                   | 0.003                                                                        |                              |
| Bond angles (°)                                    | 0.557                      | 0.610                      | 0.744                                   | 0.754                                                                        |                              |
| <b>Validation</b>                                  |                            |                            |                                         |                                                                              |                              |
| MolProbity score                                   | 1.39                       | 1.80                       | 1.74                                    | 2.03                                                                         |                              |
| Clashscore                                         | 7.16                       | 11.47                      | 9.15                                    | 15.88                                                                        |                              |
| Poor rotamers (%)                                  | 0                          | 2                          | 2                                       | 3                                                                            |                              |
| Ramachandran plot                                  |                            |                            |                                         |                                                                              |                              |
| Favored (%)                                        | 98.2                       | 96.5                       | 96.2                                    | 95.3                                                                         |                              |
| Allowed (%)                                        | 1.8                        | 3.5                        | 3.8                                     | 4.5                                                                          |                              |
| Disallowed (%)                                     | 0                          | 0                          | 0                                       | 0                                                                            |                              |

## Supplementary text

### Supplementary Text S1. Notes on PCA.

#### Details of structural survey

PC values and annotations for all representative structures are contained in Supplementary Files S1 and S2: `supp_table_pca_act.csv` and `supp_table_pca_tub.csv`.

|                                                     | <b>Actins</b>                                                  | <b>Tubulins</b>                                                                                                |
|-----------------------------------------------------|----------------------------------------------------------------|----------------------------------------------------------------------------------------------------------------|
| Representatives used to search PDB                  | 5AEY_C, 5JLF_D, 5LJV_D, 5MW1_D, 4CZJ_B, 4A2B_A, 6F95_B, 4XHN_A | 1W59_A, 3CB2_A, 3ZID_A, 4EI7_A, 4XCQ_A, 3R4V_A, 2BTQ_A, 2BTQ_B, 3M89_A, 3VOA_A, 1RLU_A, 4B45_A, 5M8G_A, 5M8G_C |
| N of chains downloaded from PDB                     | 459                                                            | 1441                                                                                                           |
| N of entries downloaded from PDB                    | 233                                                            | 329                                                                                                            |
| N of chains used as cluster representatives for PCA | 107                                                            | 165                                                                                                            |
| N of aligned, un-gapped “core” positions            | 143                                                            | 205                                                                                                            |
| N of invariant residues                             | 18                                                             | 17                                                                                                             |

#### Commentary on selected actin structures

In this section and the one for tubulins, outliers in the PC subspaces are briefly described, along with all structures whose polymerisation state was annotated “special/ambiguous” (coloured green in Figures 2e and 5c, marked here with an asterisk “\*”), often also outliers.

#### Outliers

2ZWH\_A – Model for the eukaryotic F-actin structure (Oda et al. 2009), derived from fibre diffraction data; structure performs poorly on validation metrics and was refined without modern tools.

5YU8\_A – Cofilin(severing protein)-decorated eukaryotic actin filament (Tanaka et al. 2018), i.e. highly unstable. Filament structure, but conformation is closer to the monomer cluster.

1HLU\_A – Interesting eukaryotic actin open monomer, but structure performs poorly on validation metrics and was refined without modern tools.

5WFN\_A – Eukaryotic actin complex with leiomodin, a nucleator protein that binds at multiple sites on the monomer. Interestingly the conformation is *more* open than most monomers (the opposite of e.g. 4A62\_B).

4A62\_B\* – ParM complex with fragment of ParR, its filament nucleator. The monomeric structure adopts a conformation similar to the polymerised protein.

## Commentary on selected tubulin structures

### Outliers

5H5I\_A\* – FtsZ R29A point mutant in which the energy barrier between the subunit switch states has been removed (Fujita et al. 2017).

6UMK\_A, 6UNX\_A, 6LL5\_A – three representatives of the somewhat unusual FtsZs from *Klebsiella pneumoniae* and *Escherichia coli*.

6BBN\_D –  $\alpha\beta$ -tubulin from a curved tubulin complex induced by the kinesin-13 Kif2A.

1W59\_A\*, 1W59\_B\* – two FtsZ chains, identical in sequence, form a pseudo-polymerised dimer inside a crystal.

6B0C\_A\*, 6B0C\_B\* – these two chains form a polymer of tubulin heterodimers around the outside of a microtubule, linked via kinesin-13s.

6V5V\_G\* – structure of gamma-tubulin in the native human gamma-tubulin ring complex.

7ANZ\_A\*, 7ANZ\_B\* – two gamma tubulins within a structure of gamma-Tubulin Small Complex (gTuSC).

Four unusual  $\alpha$ -tubulin conformations, from polymer structures but which are found in the monomeric conformation cluster:

1TVK\_A – electron crystallography structure.

6REV\_A – Cryo-EM structure of human doublecortin (MT stabiliser) bound to 13-pf GDP-MT.

1JFF\_A – electron crystallography structure of zinc-induced sheets.

6CVJ\_A – Tau bound to MT by cryo-EM. Possibly a refinement mistake.

And the reverse, two  $\alpha$ -tubulin monomer structures that lie close to the filament cluster.

6GWC\_A – from a heterodimer in complex with a synthetic protein binding partner.

4FFB\_A – from a heterodimer in complex with a TOG MT depolymerase domain.

## Supplementary Text S2. Proteins used in this study.

### *Drosophila melanogaster* tubulins

$\alpha$ 1 tubulin at 84B (His<sub>6</sub>-tag [red], PC-tag [cyan], tubulin M1 underlined):

MHHHHHEDQVDPRLIDGKGGGRPMRECI SIHVQAGVQIGNACWELYCLEHGIQPDGQMP SDKTVGGGDSFN TFFSETGAGKHVPRAVFDLEPTVVDEV  
RTGTYRQLFHPEQLITGKEDAANNYARGHYTIGKEIVDLVLDRIKRLADQCTGLQGFLIFHSFSGGTGSGFTSLLMERLSVDYGKKSLEFAIYPAPQVSTAV  
VEPYNSILTTHTTLEHSDCAFMDNEAIYDICRRNLDIRPTYTNLNRLIGQIVSSITASLRFDGALNVDLTEFQTNLVPYPRIHFPLVTYAPVISA EKAYHE  
QLSVAEITNACFEPANQVMVKCDPRHGKYM ACCMLYRGDVVVKD VNAAIATIKTKRTIQFVDWCPTGFKVGINYPPTVVPGGDLAKVQRAVCMLSNTTAAIEA  
WARLDHKFDL MYAKRA FVHWYVGE GMEEGEFSEAREDLAALEKDYEEVGMDSGDGEGEGAE EY\*

$\beta$ 1 tubulin at 56D isoform B (co-purified with tagged  $\alpha$ 1 tubulin 84B):

MREIVHIQAGCGNQIGAKFWEIISDEHGIDATGAYHGDSDLQLERIN VVYNEASGGKYV PRAVLVDLEPGTMDSVRSGPFGQIFRPDNFVFGQSGAGNNWAK  
GHYTEGAELVDSVLDVVRKEAESCDLQGFQLTHSLGGGTGSGMG TLLISKIREEY PDRIMNTYSVVPSPKVS DTVVEFPYNATLSVHQLVENTDETYCIDNEA  
LYDICFRTLKLTTPYGDNLHLVSLTMSGVTTCLRFPGQLNADLRKLAVNMVFPRLHFFMPGFAPLTSRGSQQYRALTVPELTQQMFDAKNMMAACDPRHGR  
YLTVAAI FRGRMSKMEVDEQMLNIQNKNSSYFVEWIPNNVKTAVCDIPRGLKMSATFIGNSTAIQELFKRISEQFTAMFRRAFLHWYTGEGMDEMEFTEAE  
SNMNDLVSEYQQYQEAETADEDAEFEEEQEA EVDEN

### *Mycobacterium tuberculosis* FtsZ

MtbFtsZ (His<sub>6</sub>-tag and linker/PreScission cleavage site [red], residues in [cyan] non-specific due to cloning strategy, FtsZ M1 underlined)

MSYHHHHHHHDYDIPTTLEVL FQ/GPMGTPPHNYLAVIKVVIGIGGGVNAVNRMI EQGLKGV EFAINTDAQALLMSDADVKLDVGRDSTRGLGAGADPEVGR  
KAAEDAKDEIEELLRGADMV FVTAGEGGGTGTGGAPVVASIARKLGALTVGVTRPFSFEGKRRSNQAENGI AALRESCDTLIVI PNDRL LQMGDAAVSLMDA  
FRSADEVLLNGVQGITDLITTPGLIN VDFADVKGIMSGAGTALMGIGSARGEGRSLKAAEIAINSPLLEASMEGAQGVLM SIAAGSDLGLFEINEAASLVQDA  
AHPDANIIFGTVIDDSLGDDEV RVTVIAAGFDVSGPGRKPV MGETGGAHRIESA KAGKLTSTLFE PVDVAVSVPLHTNGATLSIGD DDDVDVVPFMR\*

### *Prostheco bacter de joneij* BtubA\*B

BtubA\*, (R284G, R286D, F287G, M-loop mutations underlined):

MKVNNITVVSIGQAGNQIAASFWKTVCLEHGIDPLTGQTAPGVAPRGNWSSFFSKLGE SSSGSYV PRAIMVDLEPSVIDNVKATSGSLFNPANLISRTEGAGG  
NFAVG YLGAGREVLP EVM SRLDYEIDKCDNVGGIIVLHAIGGGTGS GFALLIESLKEKYGEIPVLSCAVLPSPQVSSVVTEPYNTVFALN TLRRSADACLIF  
DNEALFDLAHRKWNIESPTVDDL NLLITEALAGITASMRFSGLTVEISLRELLTNLVPQPSLHFLMCAFAPLTPPDGSDGEELGIEEMIKSLFDNGSVFAAC  
SPMEGRFLSTAVLYRGIMEDKPLADAALAMREKLPLTYWIPTAFKIGYVEQPGISHRKS MVLLANNTEIARVLD RICHNFDKLWQRKAFANWYLN EGMSEEQ  
INVLRASAQELVQSYQVAEE SGA KAKVQDSAGDTGMRAAAAAGVSDDARGMSLRDLVDRR

BtubB:

MREILSIHVQCGNQIADSFWRALALREHGLTEAGTLKEGSNAAANSNMEVFFHKVRDGYV PRAVLVDLEPGVIARIEGGDMSQLFDESSIVRKIPGAANNWA  
RGYNVEGEKVIDQIMNVIDSAVEKTKGLQGFLMTHSIGGGSGSLGSLILERLRQAYPKKRIFTFSVVPSP LISDSAVEPYNAI LTLQRILDNADGAVLLDNE  
ALFRIAKAKLNRS PNYMDLNNI IALIVSSVTASLRFPGKLN TDLSEFVTNLVPPFGNHFLTASFAPMRGAGQEGQVRTNF PDLARETF AQDNFTAAIDWQQGV  
YLAASALFRGDVKAKDV DENMATIRKSLNYASYPASGGLKLG YAETAPEGFASSGLALVNHTGIAAVFERLIAQFDIMFDNHAYTHWYENAGVSRDMMAKAR  
NQIATLAQSYRDAS

## Supplementary figures

### Supplementary Figure S1. Actin PCA supplements

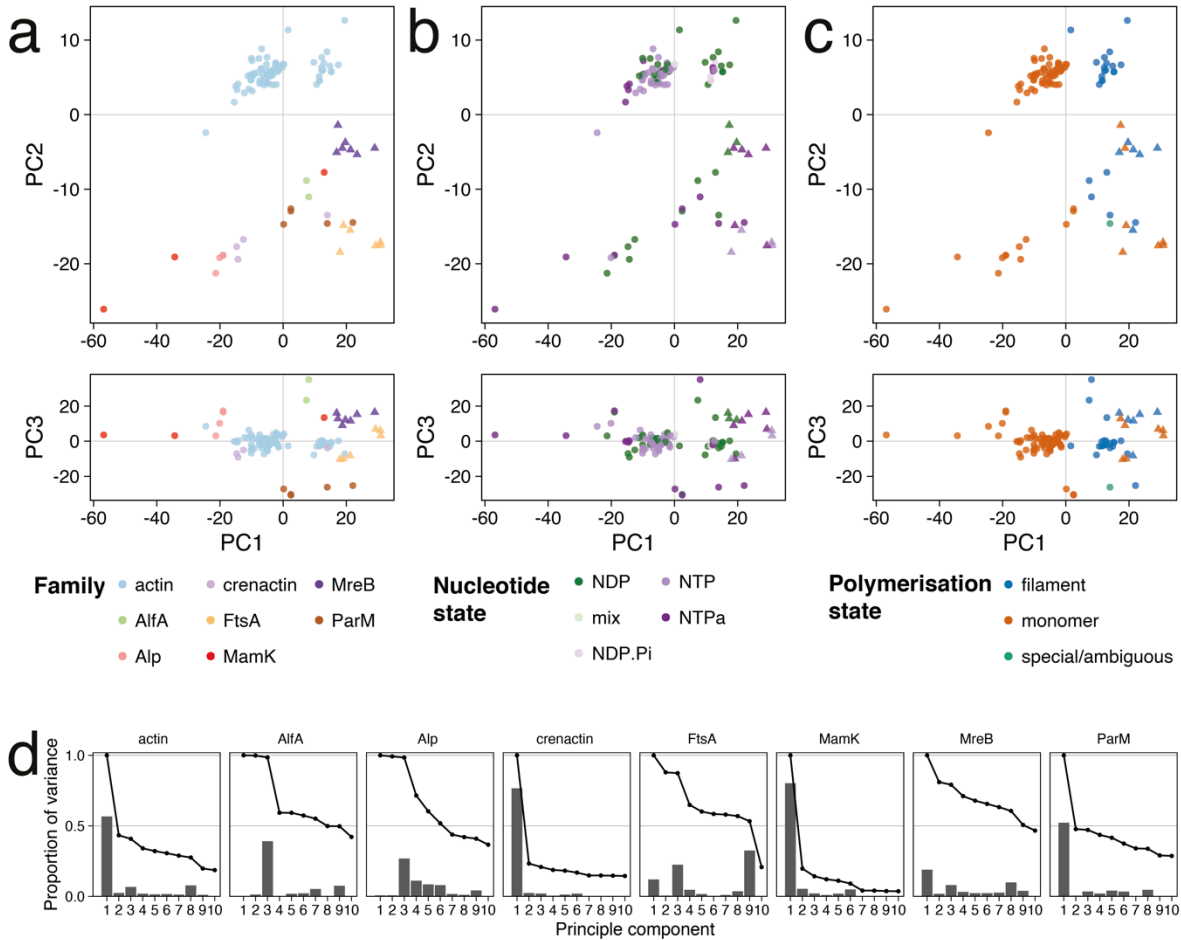

(a-c) Actin PC subspaces as in Figure 2, with the PC1-PC3 subspaces added below each plot. (d) Proportion of variance within each family's C $\alpha$ s explained by each of the superfamily PCs. PC1 is descriptive for the (cytomotive) families with representatives of both polymerised and unpolymerised subunits. PC2 mostly describes differences between families so is not descriptive for any given family.

**Supplementary Figure S2. Actin PCA with labelled structures**

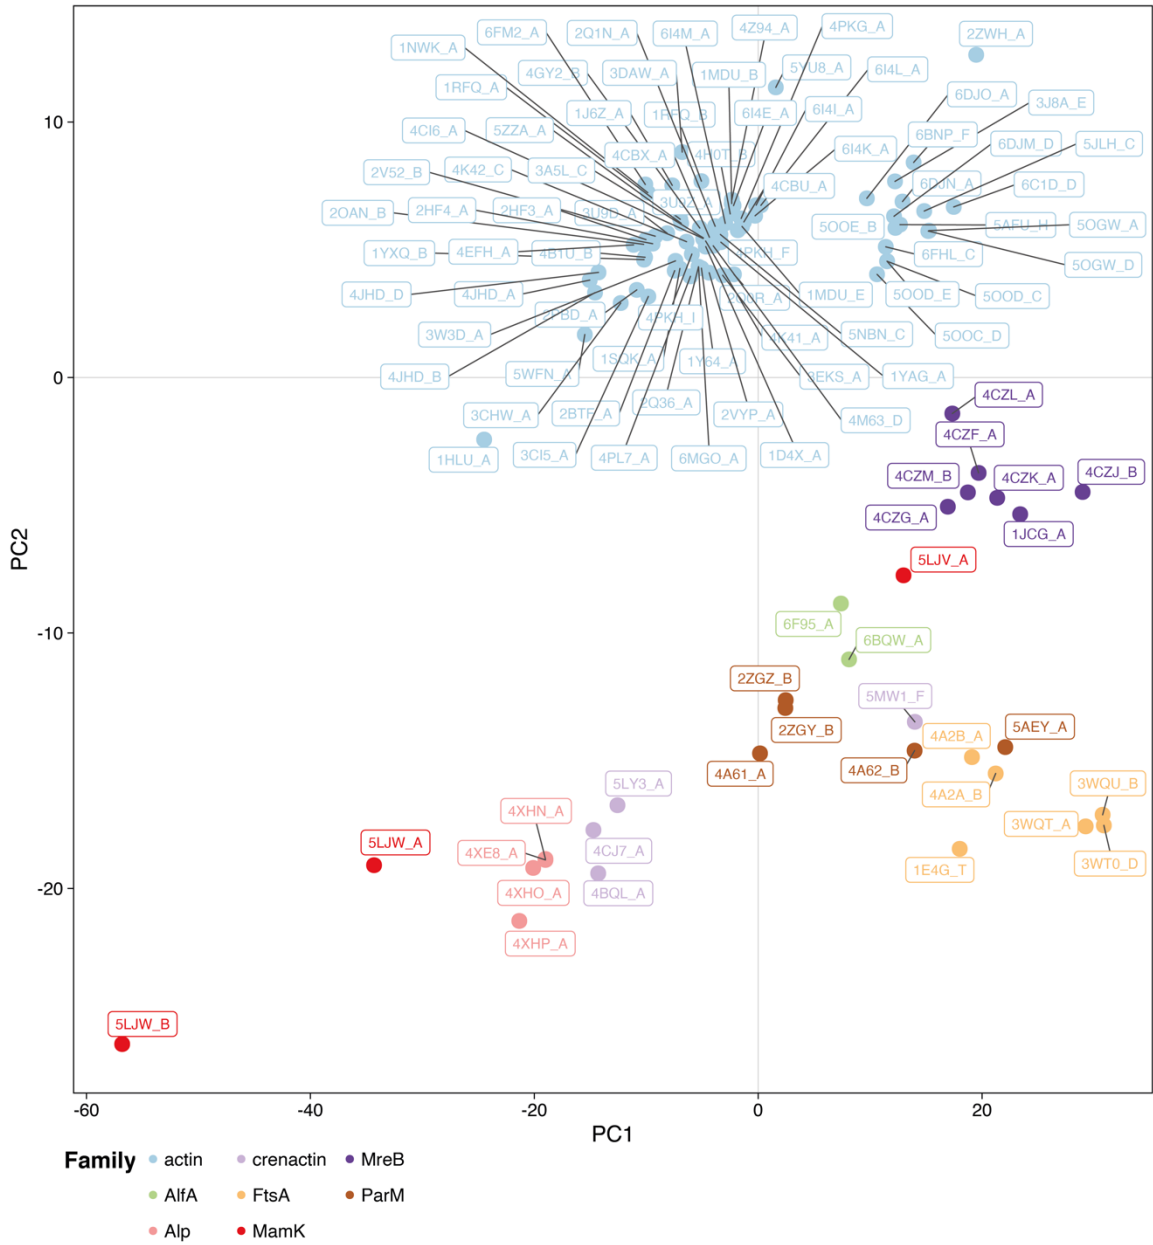

Actin PC1-PC2 subspace as in Figure 2c, with each representative structure labelled in the format “PDB accession”\_”chain id”.

Supplementary Figure S3. *Drosophila melanogaster* (*Dm*) tubulin GDP cryo-EM processing scheme.

## DmAB:GDP

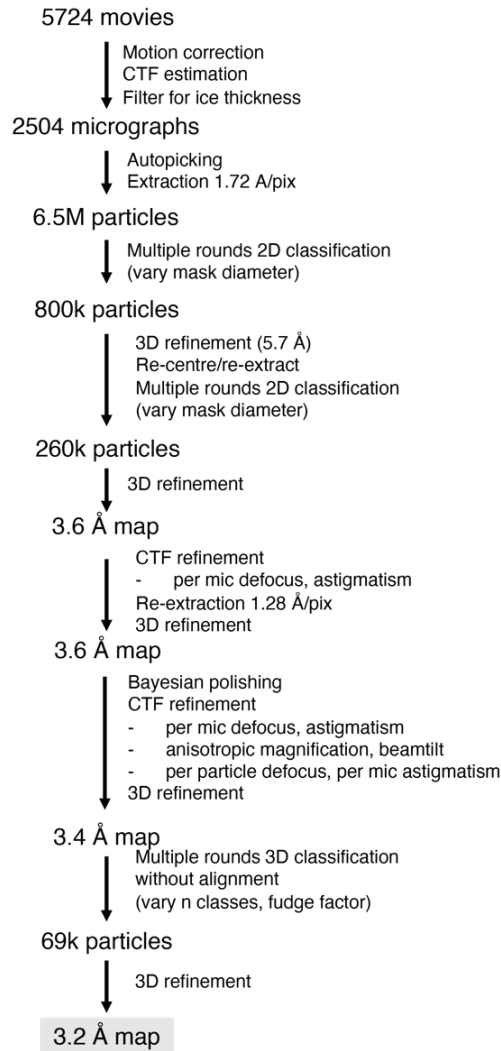



Supplementary Figure S4. *Drosophila melanogaster* (Dm) tubulin GTP cryo-EM processing scheme.

## DmAB:GTP

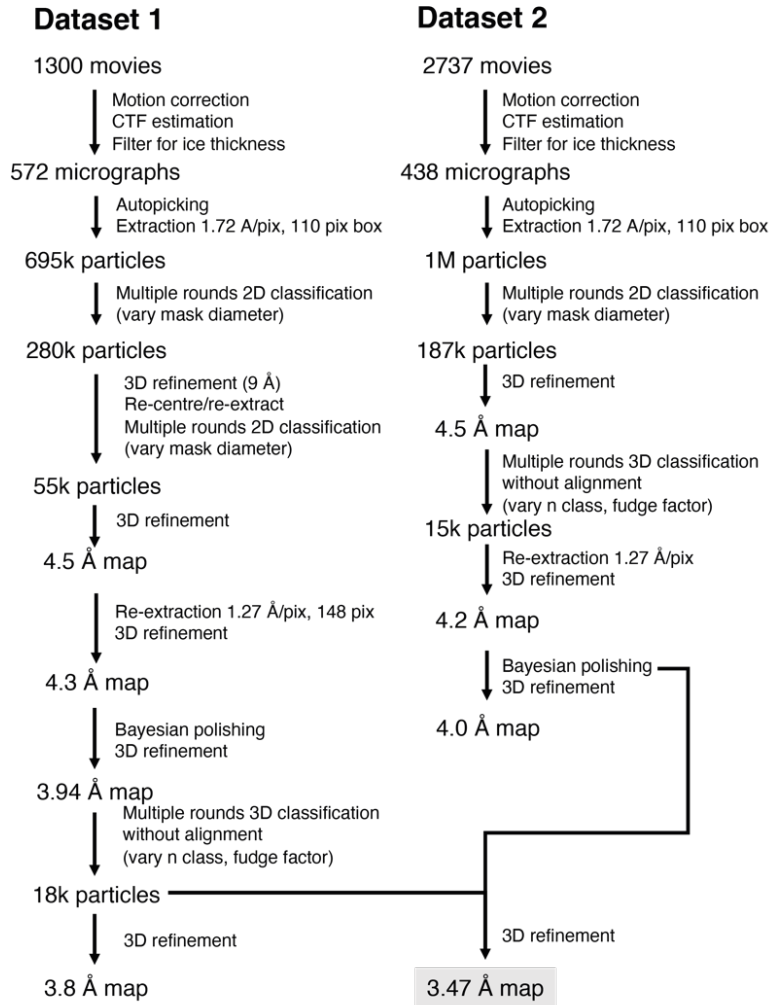

**Supplementary Figure S5. Cryo-EM structure of *Mycobacterium tuberculosis* (*Mtb*) FtsZ, a single protofilament tubulin, reveals a strict assembly switch.**

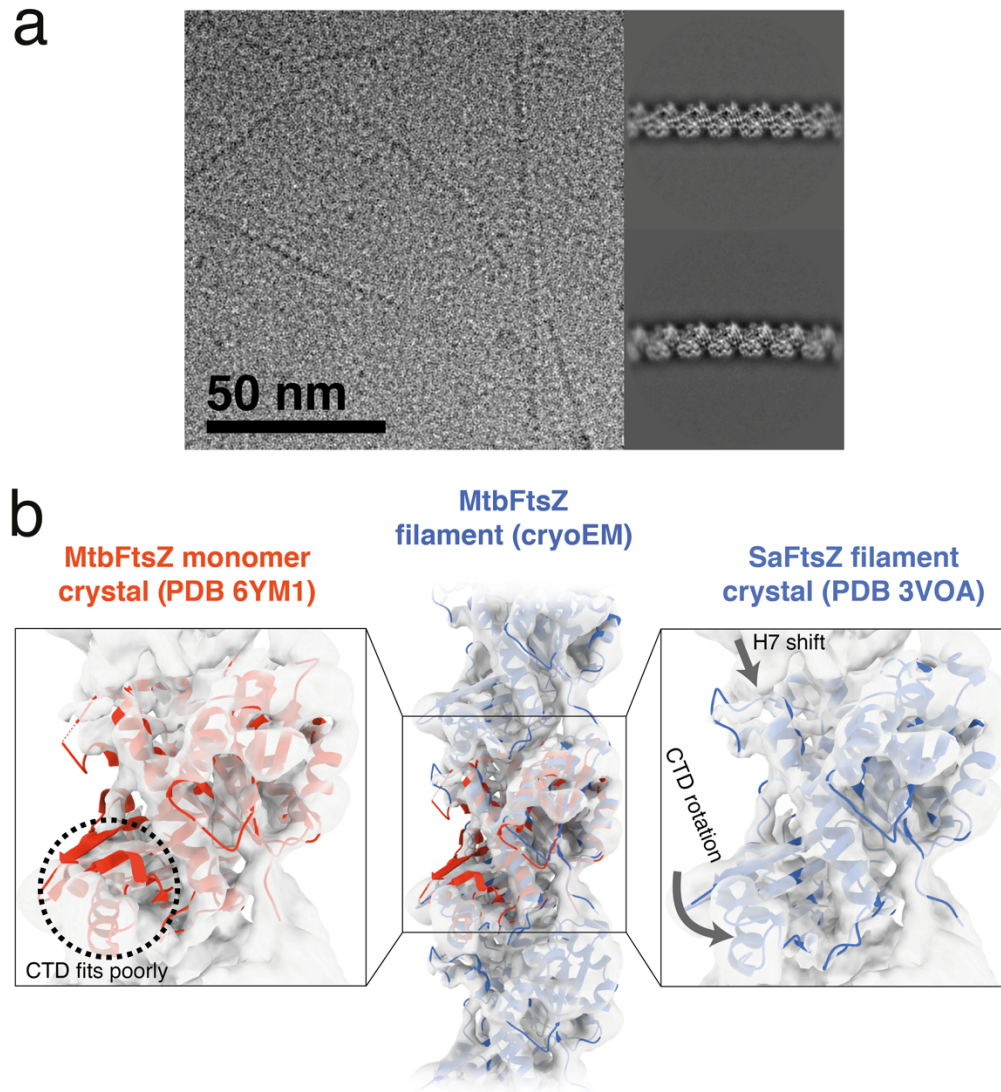

(a) Cryo-EM study of *Mycobacterium tuberculosis* (*Mtb*) FtsZ filaments. Representative micrograph and 2D class averages. Processing scheme can be found in Supplementary Figure S6. (b) Medium-resolution cryo-EM map of FtsZ filament from *M. tuberculosis*, reveals the assembly switch upon polymerisation. The map is compatible with the polymeric *S. aureus* FtsZ crystal structure (blue), but not the monomeric *M. tuberculosis* structure (orange). Map resolution is limited because of severe preferred orientation of the filaments after vitrification and the fact that the filaments are not helical (as was the case for *E. coli* FtsZ filaments, described in (J. M. Wagstaff et al. 2017))

Supplementary Figure S6. *Mycobacterium tuberculosis* (*Mtb*) FtsZ:GMPCPP cryo-EM processing scheme.

## MtbFtsZ

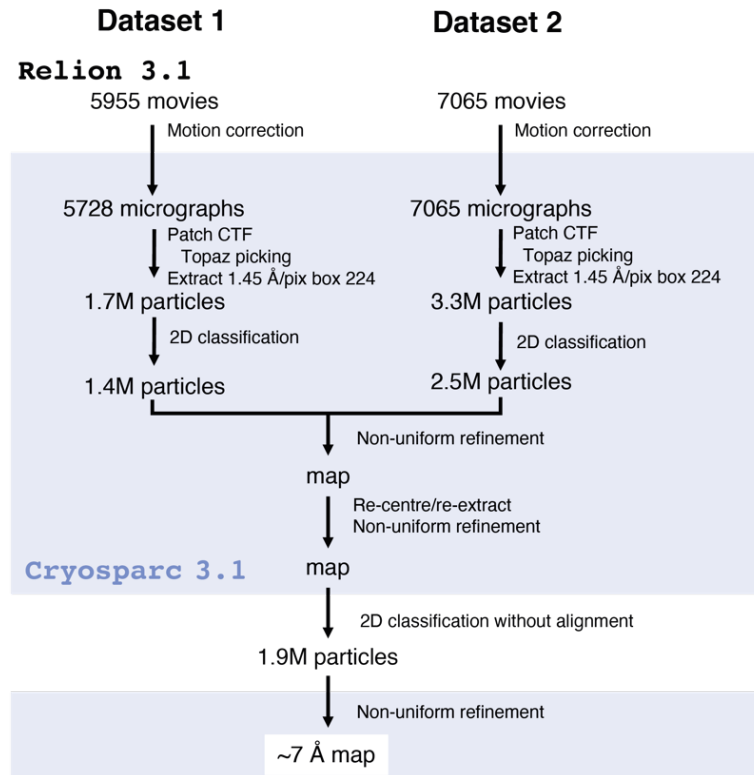

Supplementary Figure S7. BtubA\*B:GMPCPP cryo-EM processing scheme.

## BtubA\*B pf:GMPCPP

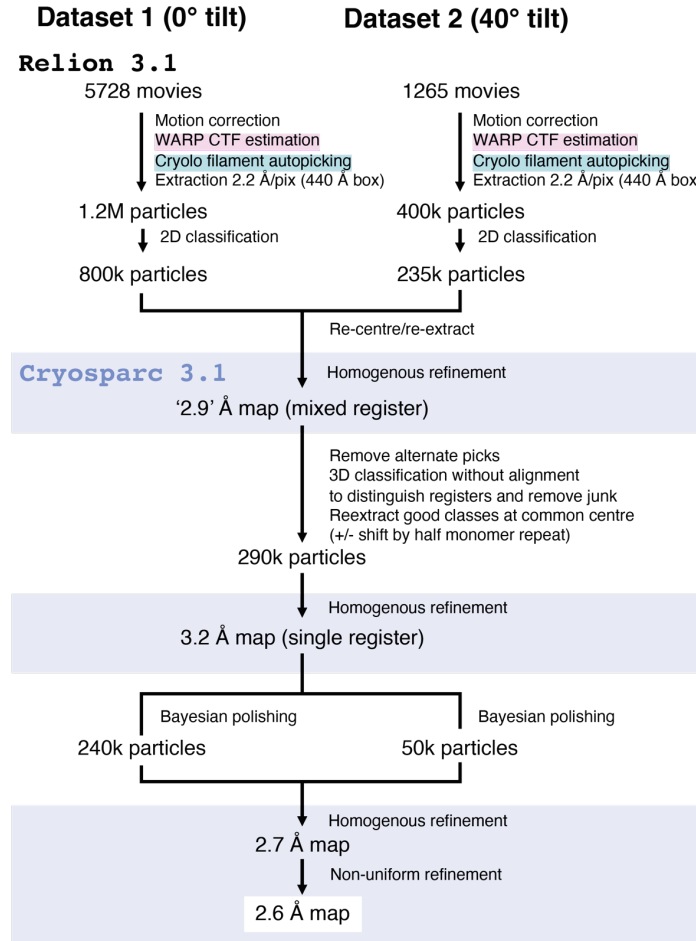

**Supplementary Figure S8. BtubA\*B polymerises with GTP to form single-stranded filaments.**

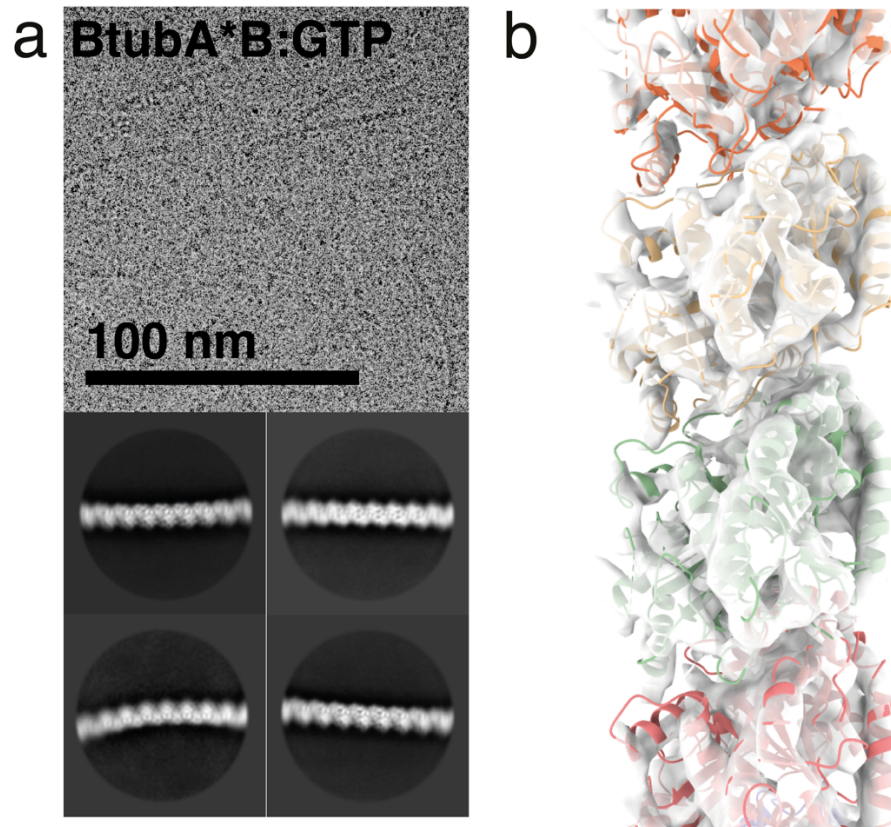

(a) Cryo-EM study of short and curved BtubAB filaments assembled with GTP. Representative micrograph and 2D class averages. (b) Medium resolution cryo-EM map ( $\sim 8 \text{ \AA}$  resolution) of BtubA\*B:GTP, with model of BtubAB filament rigid body fitted.

Supplementary Figure S9. BtubA\*B:GTP cryo-EM processing scheme.

## BtubA\*B pf:GTP

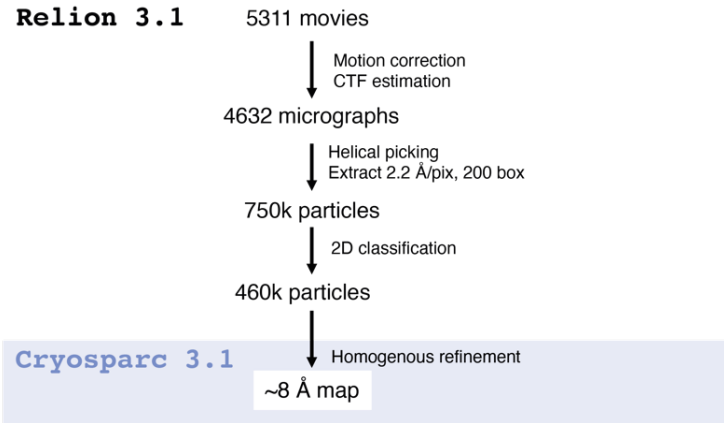

**Supplementary Figure S10. Tubulin PCA supplements.**

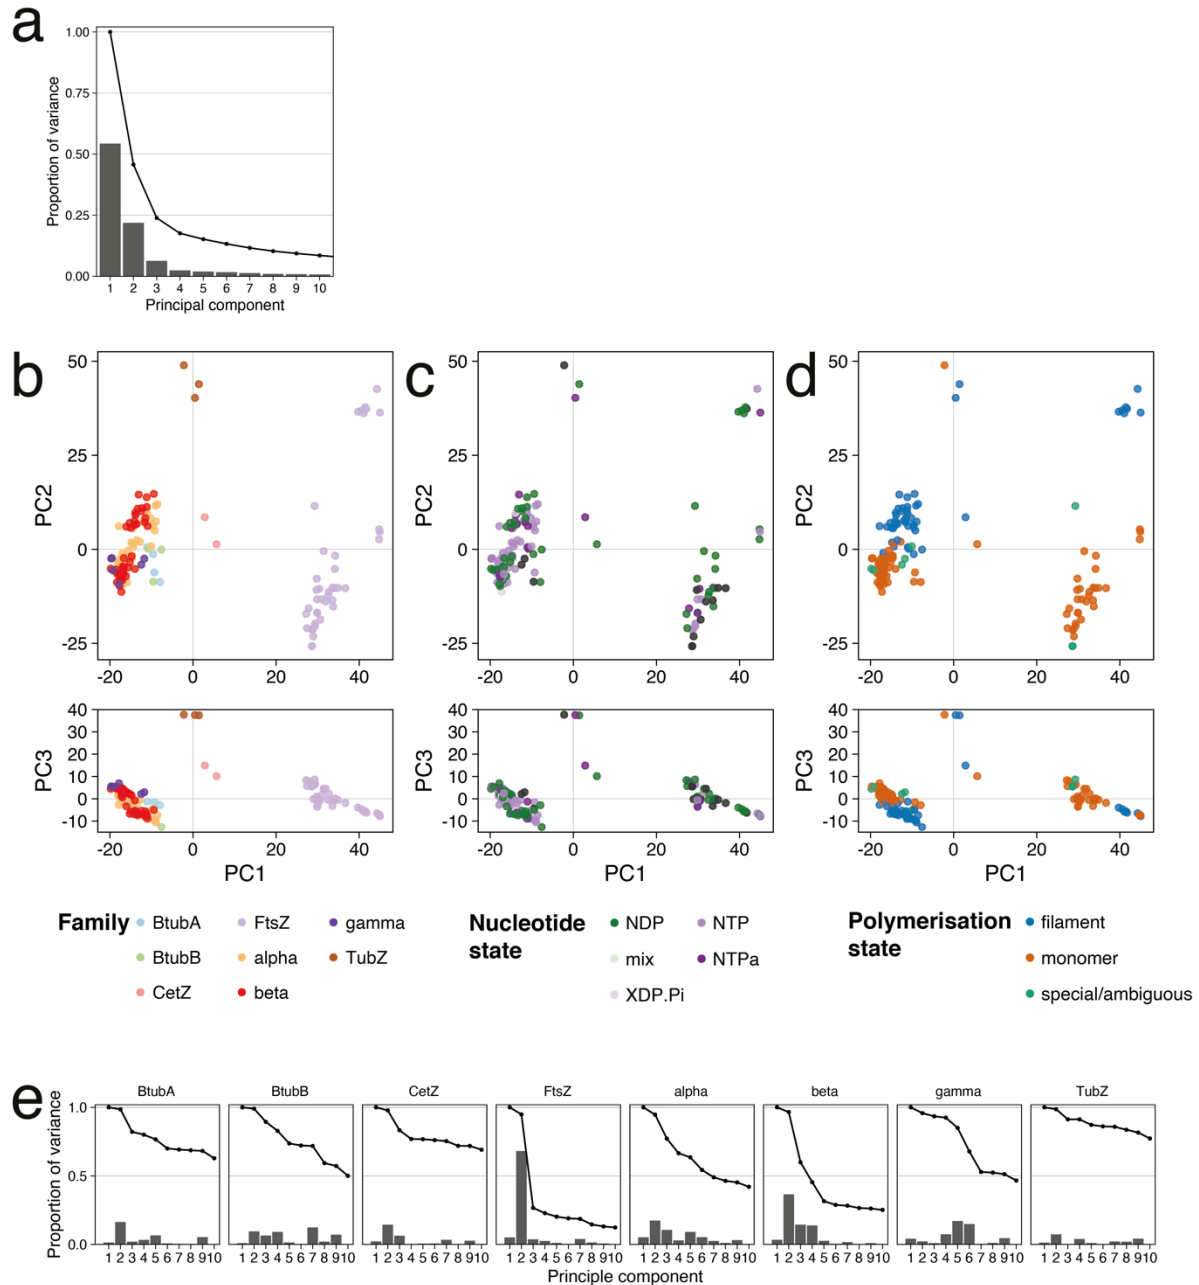

(a) Proportion of variance across all tubulin structures explained by the principal components (PC). (b-d) Tubulin PC subspaces as in Figure 5, with the PC1-PC3 subspaces added below each plot. (e) Proportion of variance within each family's  $C\alpha$ s explained by each of the superfamily PCs. PC2 is descriptive for the (cytomotive) families with representatives of both polymerised and un-polymerised subunits because it describes the polymerisation switch. PC1 mostly describes differences between families so is not descriptive for any given family.

Supplementary Figure S11. Tubulin PC1-PC2 subspace with labelled structures.

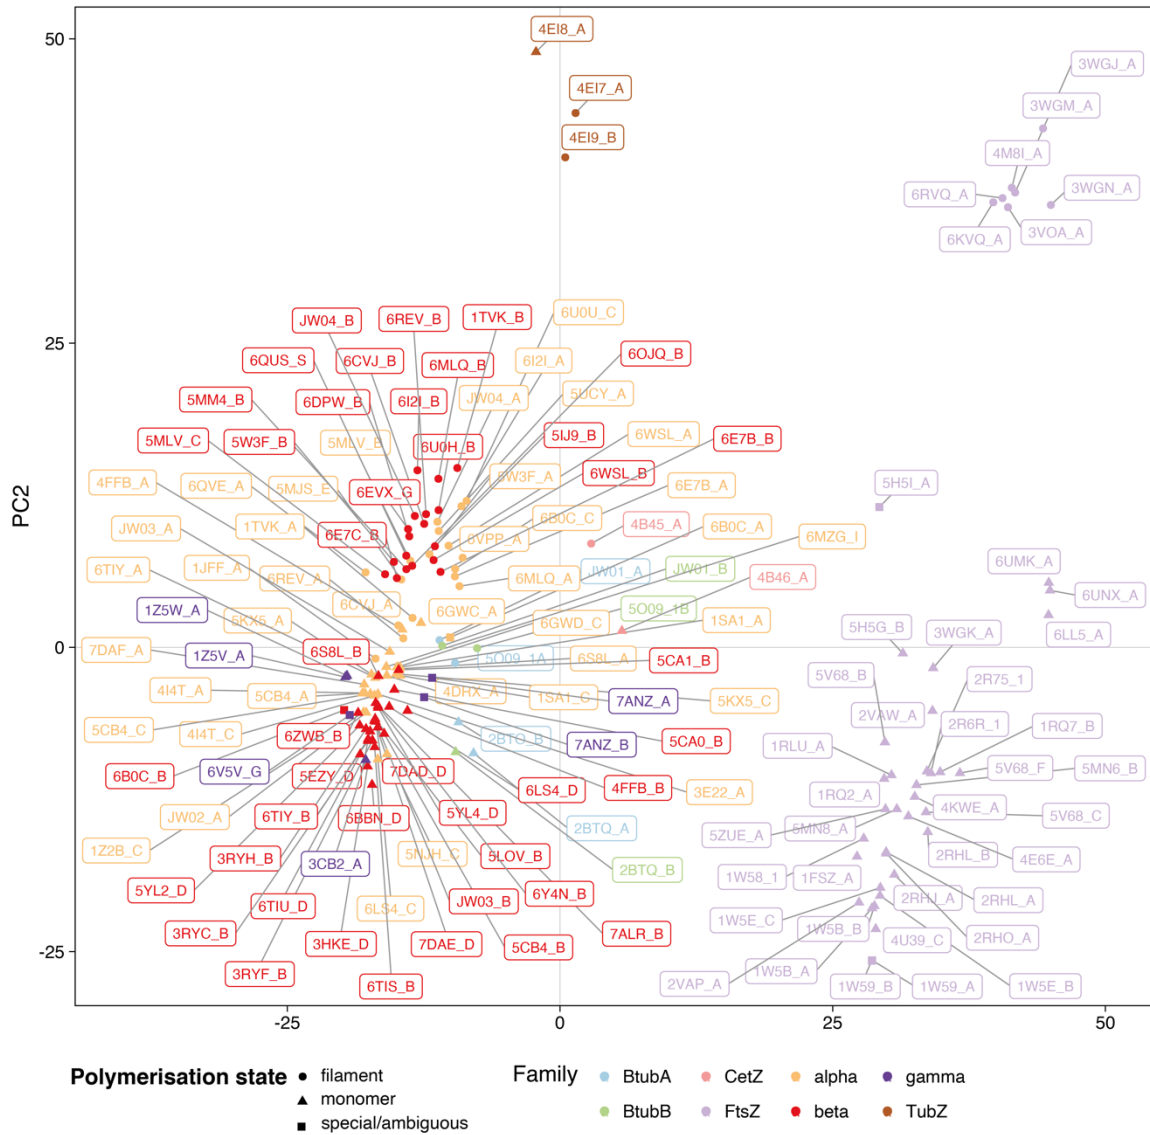

Tubulin PC1-PC2 subspace as in Figure 5a, with each representative structure labelled in the format “PDB accession”\_”chain id”.



**Supplementary Figure S12. Un-coupled kinetic and structural polarities in a filament without a cytomotive switch**

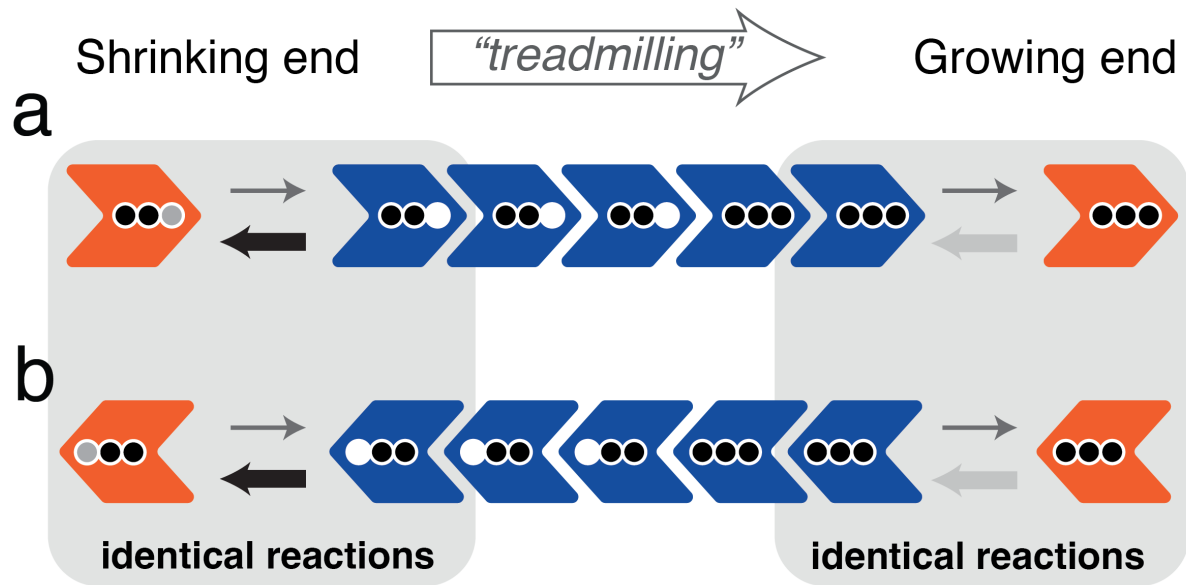

**End asymmetry stochastic**

Two possible outcomes for dynamic polymerisation of one species of rigid subunits as in Fig 6a. These subunits can treadmill, but the direction in which they do so will be arbitrarily set by stochastically formed gradients of nucleotide hydrolysis within the filament. Thus, the kinetic (plus/minus) polarity will be uncoupled from the structural (pointed/notched end of chevrons) polarity. Such a filament will be less useful for many cytomotive tasks, as specific end binding is often used for positioning sub-cellular components.

## **Supplementary Movies**

### **Supplementary Movie S1**

Visualisation of principle components (PC) 1, 2 and 3, describing structural variations among actin superfamily members.

### **Supplementary Movie S2**

Visualisation of principle components (PC) 1, 2 and 3, describing structural variations among tubulin superfamily members.

## **Supplementary Files**

### **Supplementary File S1**

Related to Supplementary Text S1: Notes on PCA. Principle component (PC) values and annotations for all representative actin-like structures are listed in the Microsoft Excel-readable comma separated values (CSV) file: `supp_table_pca_act.csv`.

### **Supplementary File S2**

Related to Supplementary Text S1: Notes on PCA. Principle component (PC) values and annotations for all representative tubulin-like structures are listed in the Microsoft Excel-readable comma separated values (CSV) file: `supp_table_pca_tub.csv`.

### **Supplementary File S3**

Sequence alignments for the PCA analyses of both actin and tubulin superfamilies. Zipped archive (.zip), containing `readme.txt`, which provides more information regarding the six files the archive contains. File: `supp_seqs.zip`.
